# Supplementary material
Source: PubMed Central journal article supplement (PMC11402387)
Supplement: NIHMS2020907-supplement-Supplementary.pdf [file NIHMS2020907-supplement-Supplementary.pdf]

Supplementary Materials for  
**Electronic health record signatures identify undiagnosed patients with  
common variable immunodeficiency disease**

Ruth Johnson *et al.*

Corresponding author: Manish J. Butte, [mbutte@mednet.ucla.edu](mailto:mbutte@mednet.ucla.edu)

*Sci. Transl. Med.* **16**, eade4510 (2024)  
DOI: 10.1126/scitranslmed.ade4510

**The PDF file includes:**

Figs. S1 to S10  
Tables S1 to S3

**Other Supplementary Material for this manuscript includes the following:**

MDAR Reproducibility Checklist

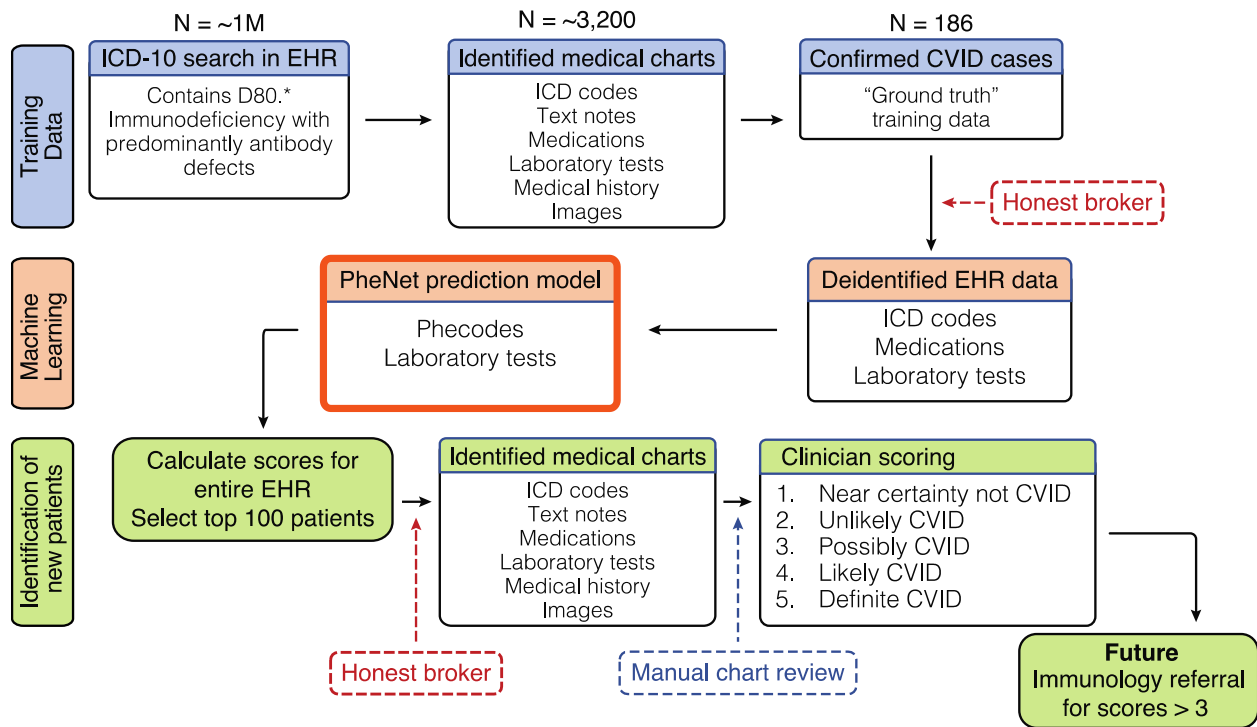

**Fig. S1. Overview of curation process for the “ground truth” CVID cohort and process of identifying new putative patients with CVID.** We provide a flowchart describing the EHR review process for constructing a well-curated list of clinically diagnosed patients with CVID. We then demonstrate how this cohort is used for training a prediction model which is then used to identify undiagnosed CVID patients in a discovery cohort. A manual chart review is performed on the patients with the highest risk score with the future goal of highly probable patients with CVID being referred to an immunologist.

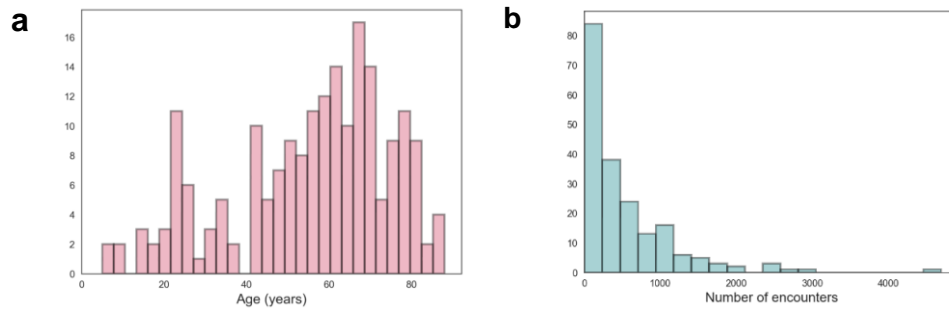

**Fig. S2: Overview of UCLA “ground truth” CVID cohort.** **a)** Distribution of ages in the CVID case cohort. We show the age of patients from their most recent encounter (up to a cutoff date in 2019). **b)** shows the distribution of the number of encounters recorded in the EHR within the case cohort. Both these histograms count the number of individuals in the case cohort on the vertical axis.

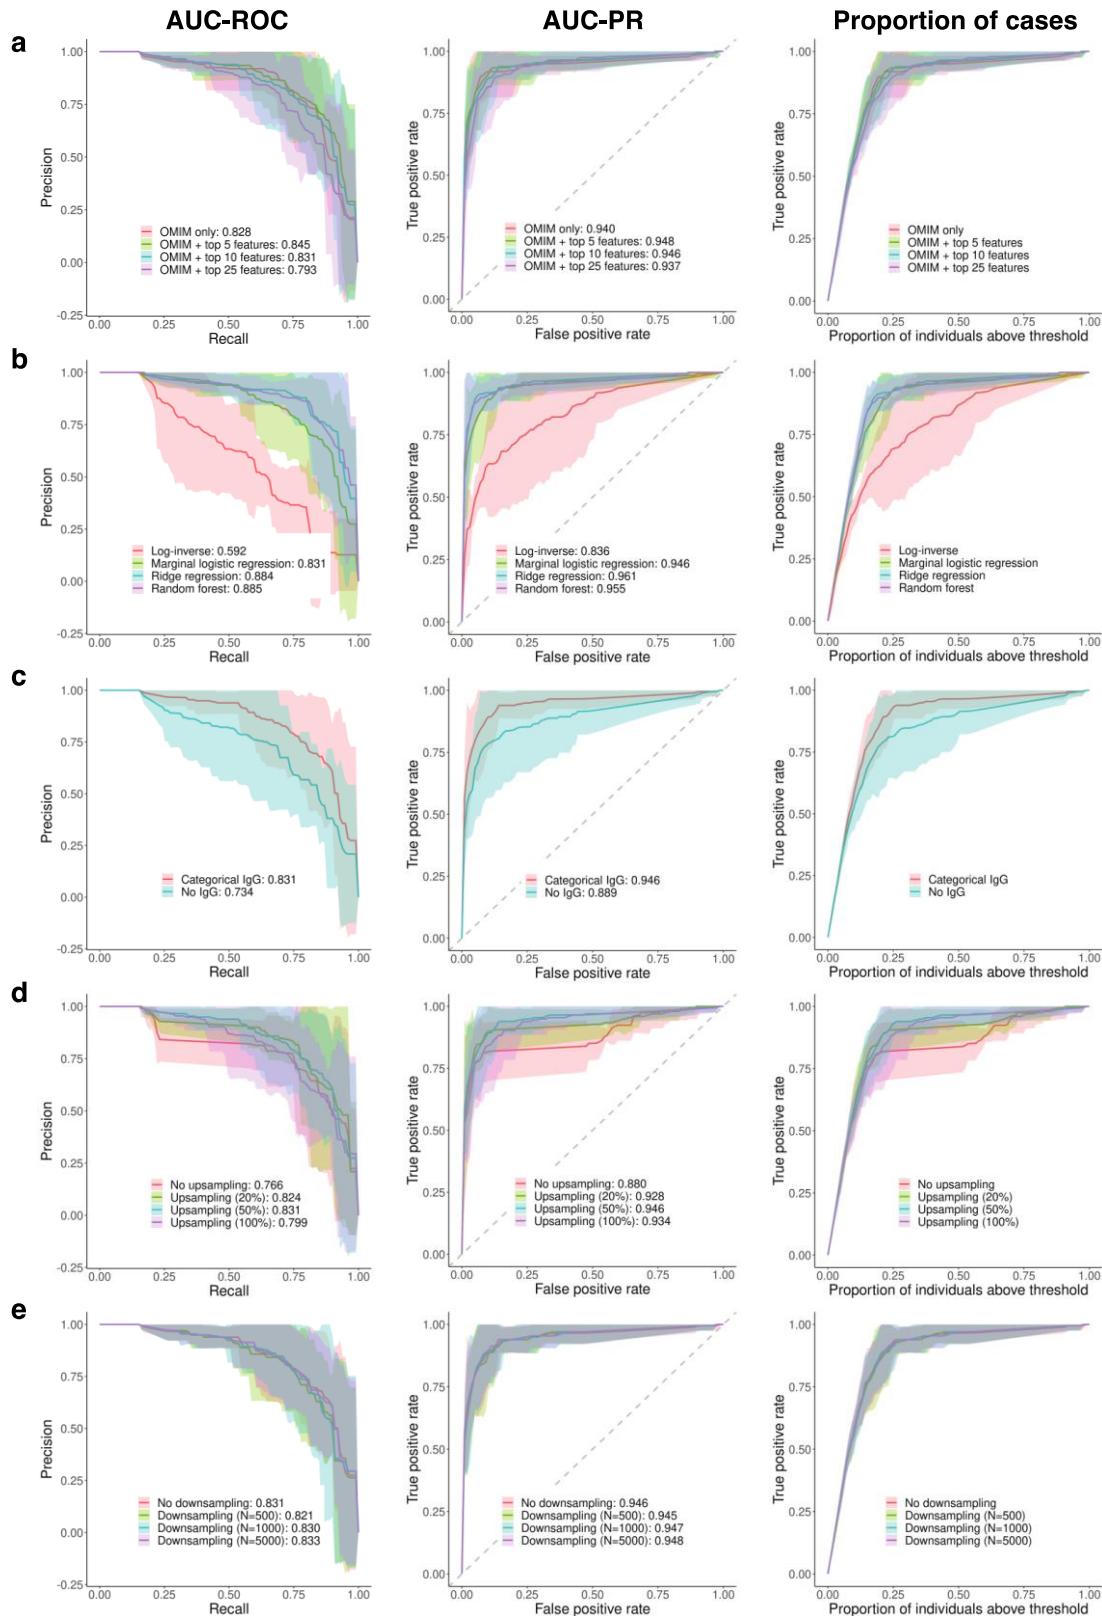

**Fig. S3: Exploration of model parameters for PheNet.** We show the Area Under the Curve for the Receiver Operating Curve (AUC-ROC) and Area Under the Curve for the Precision Recall curve (AUC-PR) for the PheNet model using matched case ( $n=197$ ) and control ( $n=1,106$ ) cohorts with 5-fold cross-validation. We also show the proportion of CVID cases captured within the varying percentiles of PheNet scores. We varied the **a)** number of additional phecode features in addition to OMIM-selected features, **b)** prediction model, **c)** inclusion of immunoglobulin G (IgG) tests, **d)** upsampling, and **e)** downsampling.

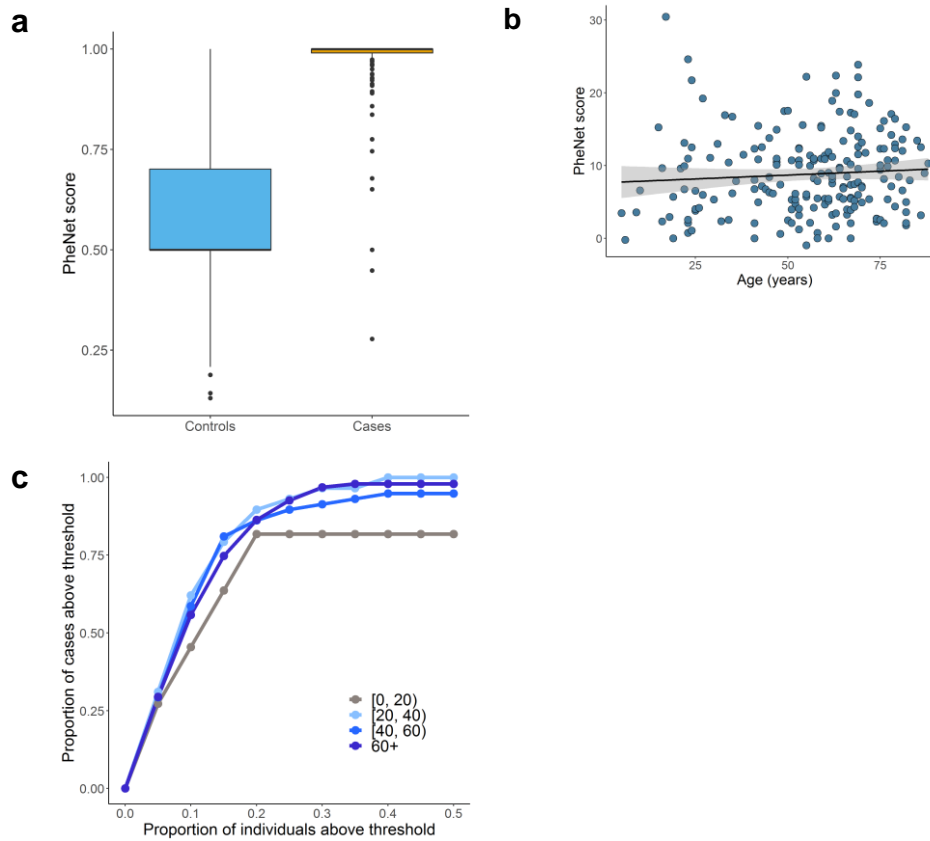

**Fig. S4: PheNet scores for cases and controls.** **a)** Normalized distribution of PheNet scores within the case-cohort and the control-cohort trained using 5-fold cross-validation. Using a Cochran-Armitage test, we found that the scores in the case-cohort are significantly higher than those in the control-cohort ( $p < 2.2 \times 10^{-16}$ ). **b)** PheNet scores did not vary by age across our case cohort. **c)** PheNet performance is better for older subjects. ROC curves showing PheNet scores calculated on ages 0-20; 20-40; 40-60; and 60+.

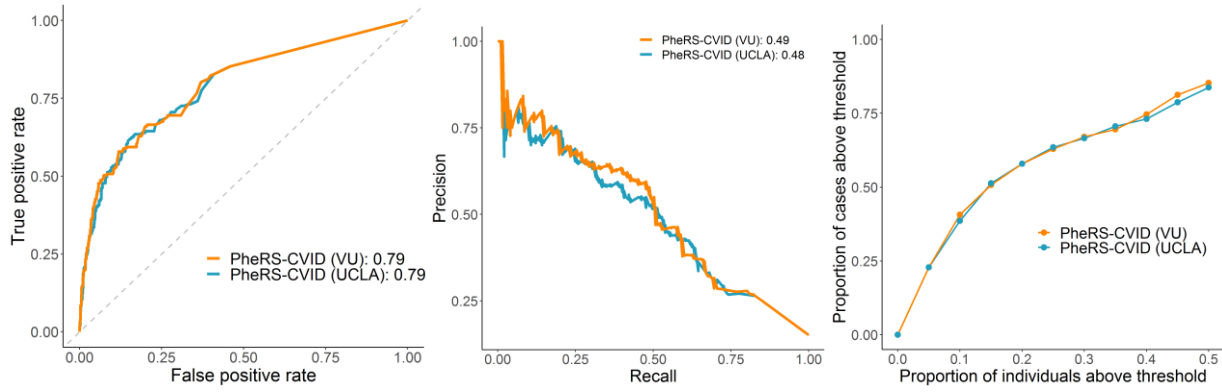

**Fig. S5: Comparing PheRS performance using models trained at UCLA and Vanderbilt.** We show AUC-ROC, AUC-PR, and calibration curves for the PheRS models trained at UCLA and Vanderbilt (VU). Models were trained and tested using our matched case and control cohorts. Because the model is unsupervised, no test-train split was needed.

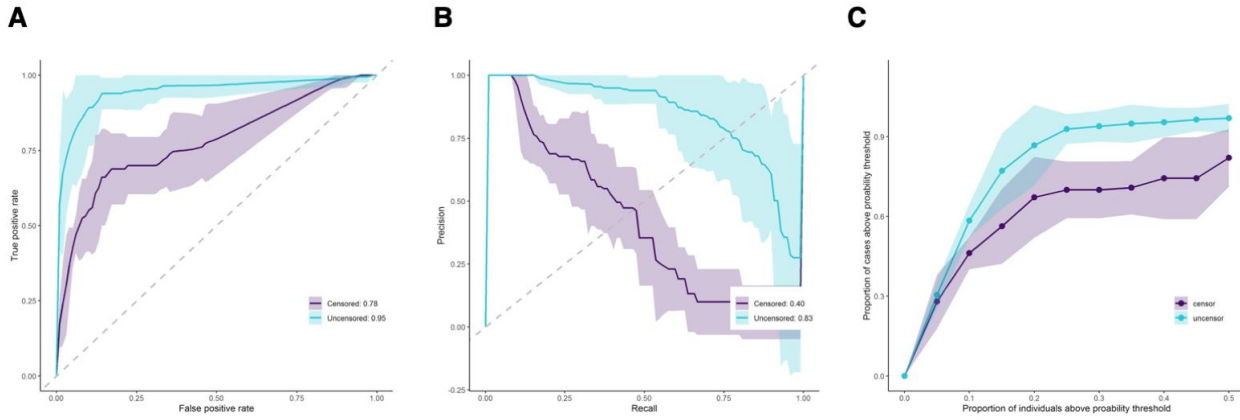

**Fig. S6: PheNet captures CVID patients with censored data.** Risk scores for CVID were calculated for each patient using PheNet with 5-fold cross-validation across case ( $n=197$ ) and control ( $n=1,106$ ) cohorts using both “censored” data that only included information before diagnosis and “uncensored” data that used the entire medical record regardless of diagnosis date. **A)** AUC-ROC and **B)** AUC-PR curves for each model. **C)** report the percentage of CVID cases captured at varying percentile cutoffs.

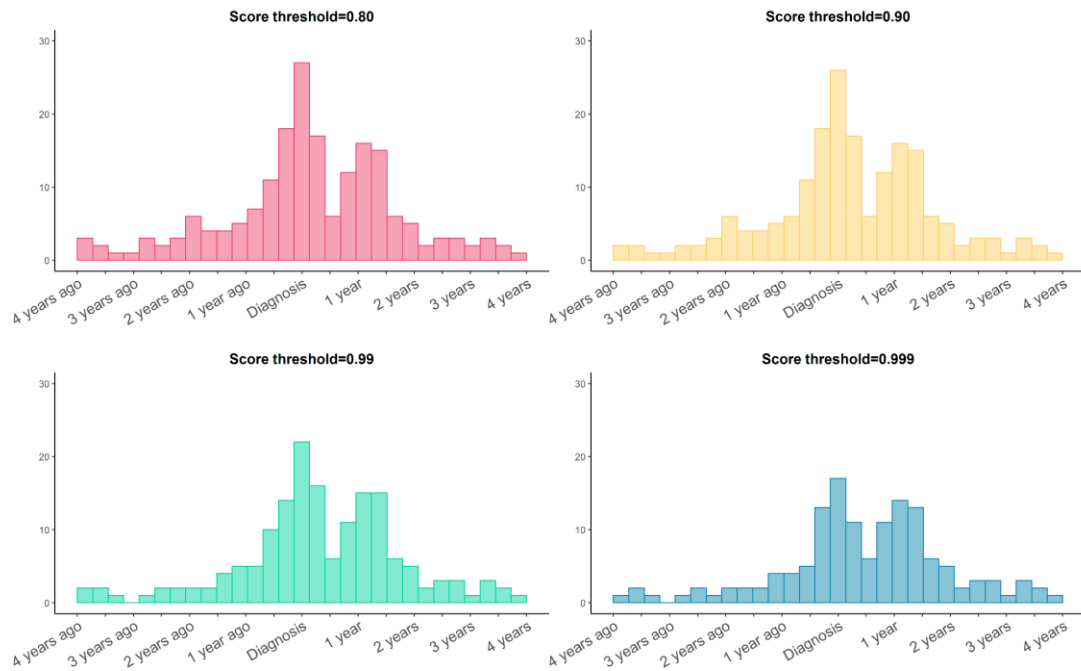

**Fig. S7: Different score thresholds capture various numbers of patients with CVID before diagnosis.** Training on the full UCLA Health population ( $n \approx 880K$ ), we estimated PheNet scores for patients with CVID using only information prior to their ICD-based diagnosis, and 5-fold cross-validation. We show the distribution of times when patients pass the scoring threshold at 0.80, 0.90, 0.99, and 0.999. We only show those patients with CVID with at least one year of recorded UCLA EHR data prior to their diagnosis ( $n=58$ ).



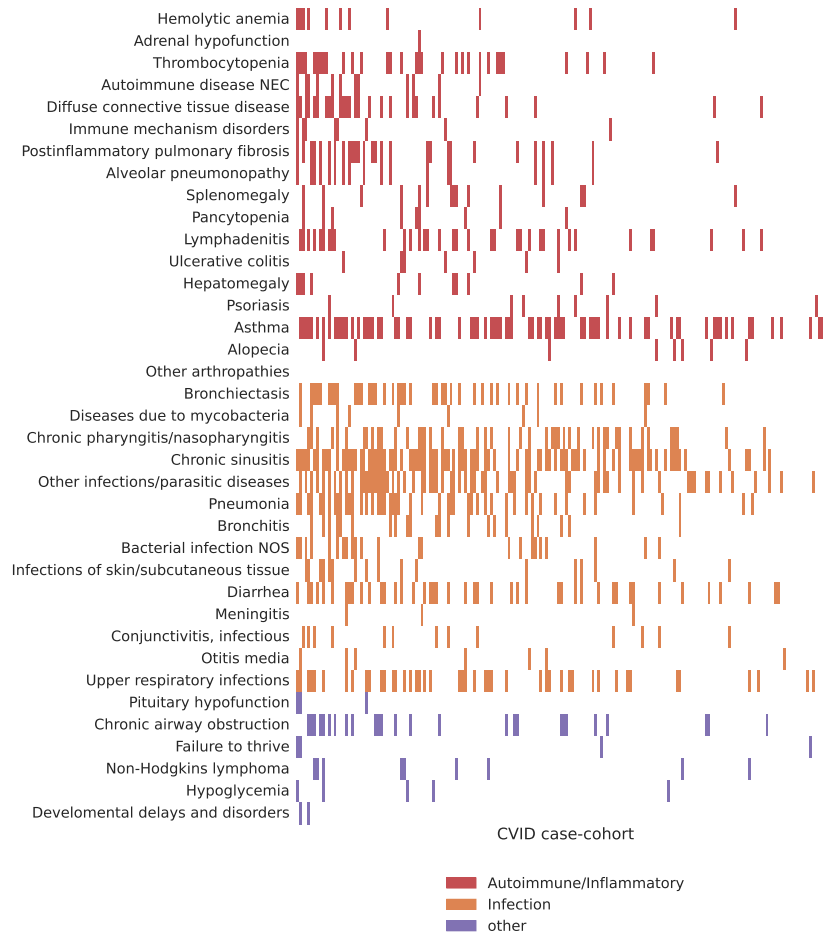

**Fig. S8: EHR signatures of individuals in the CVID case cohort.** Each row shows a clinical feature from the PheNet model and each column is a patient’s EHR profile. Individuals in the “ground truth” CVID cohort of UCLA (n=186) are shown where the lowest to highest PheNet scores are displayed right to left. Boxes are colored according to phenotype category (autoimmune / inflammation, infection, other).

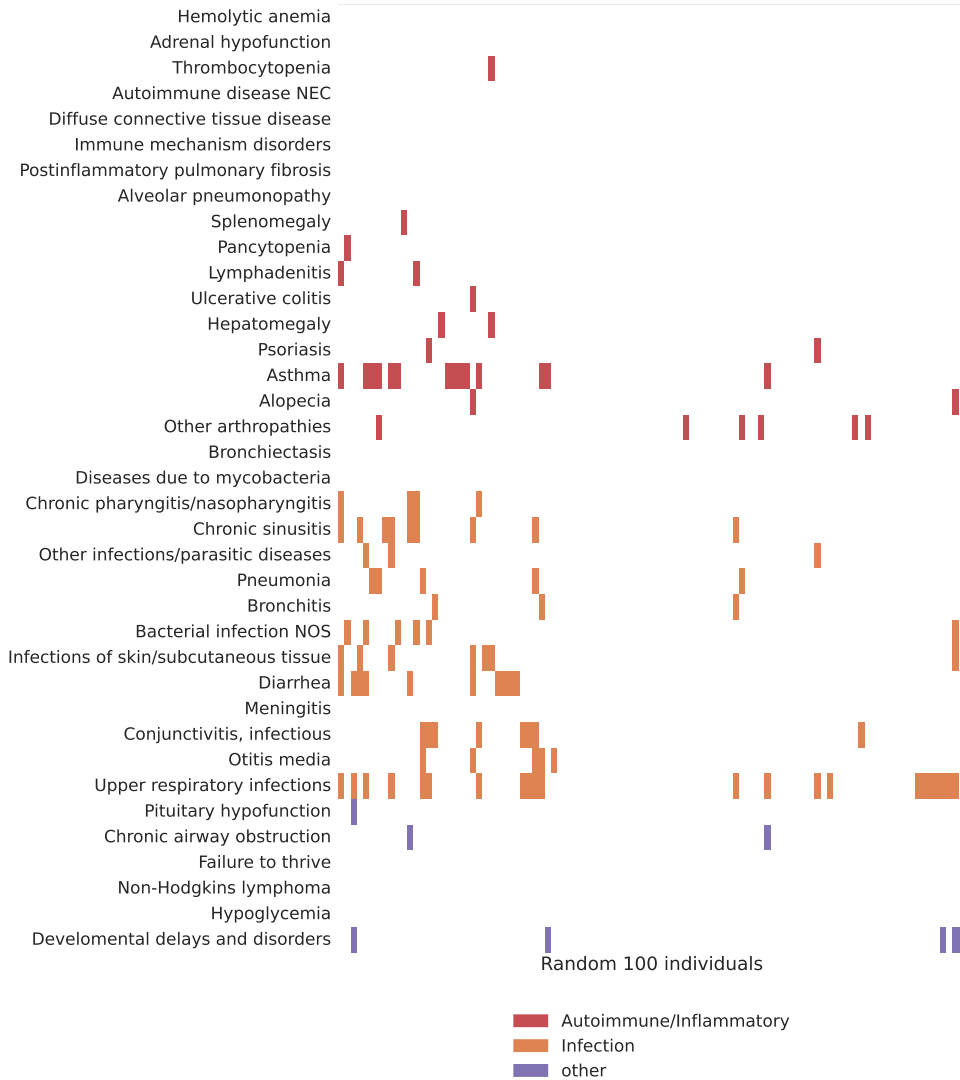

**Fig. S9: EHR signatures of individuals in a randomly selected sample.** Each row shows a clinical feature from the PheNet model and each column is a patient's EHR profile. The 100 individuals randomly sampled from the EHR are shown where the highest risk score is on the left. Boxes are colored according to phenotype category (autoimmune / inflammation, infection, other).

## a) UC San Francisco

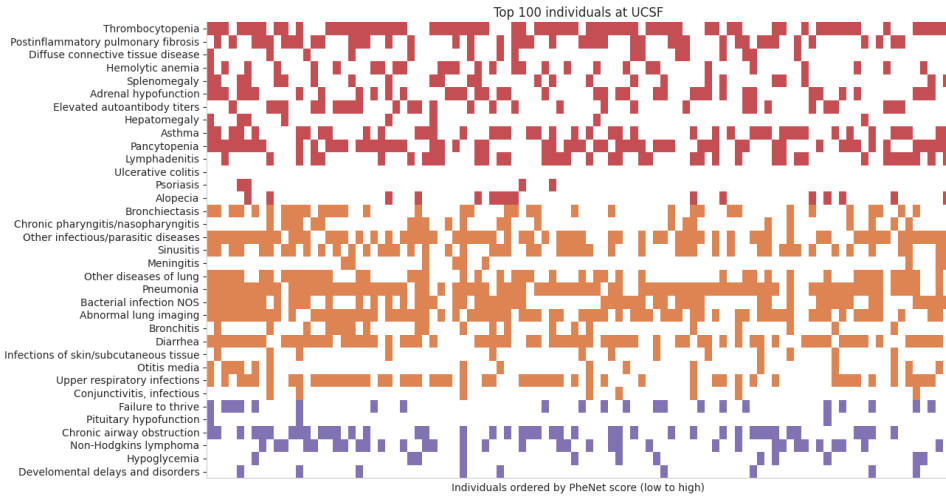

## b) UC Davis

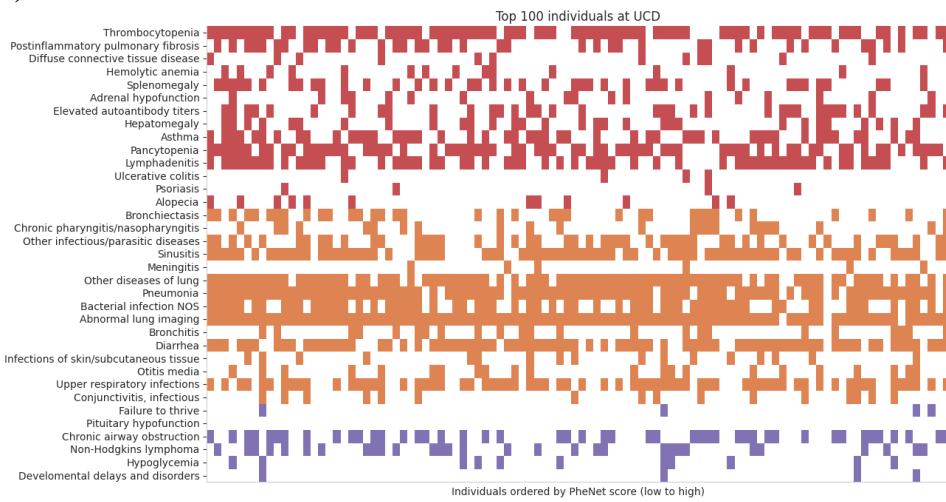

## c) UC Irvine

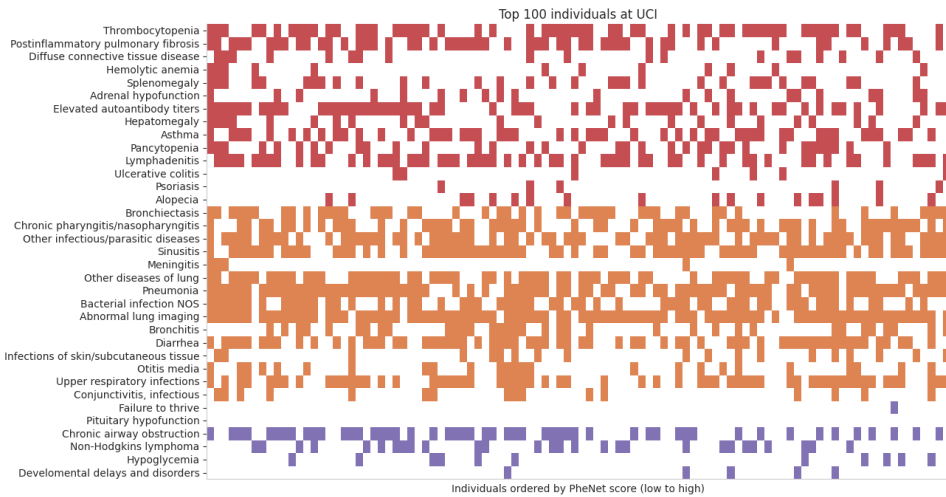

## d) UC San Diego

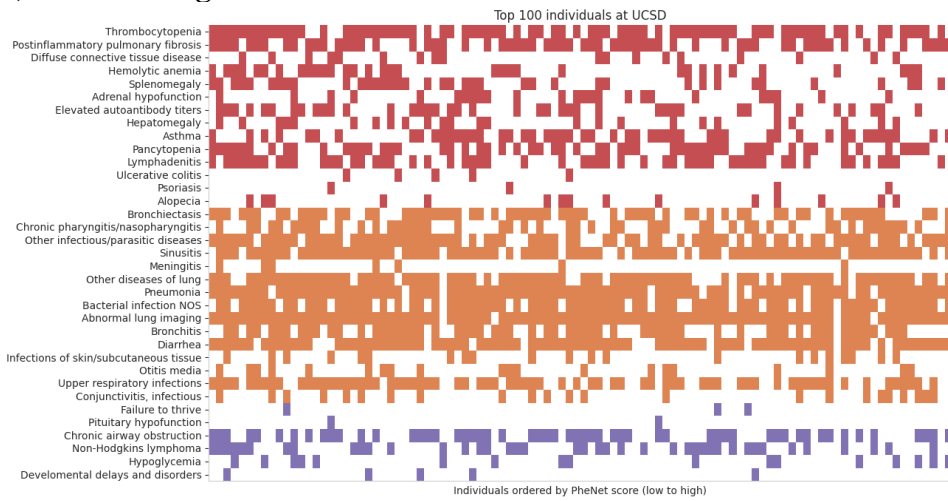

**Fig. S10.** EHR signatures of the top-100-ranked individuals drawn from four independent hospitals in the University of California system. Each row shows a clinical feature from the PheNet model, trained on the UCLA database, and then later applied to independent hospitals of the University of California system. Each column is a subject's EHR profile, where the lowest to highest risk scores are displayed left to right. Boxes are colored according to phenotype category (autoimmune, infection, other). **A)** University of California San Francisco; **B)** University of California Davis; **C)** University of California Irvine; **D)** University of California San Diego.

**Table S1. The UCLA case cohort**

| Age | IgG prior to therapy | Clinical                                                                                                                                                                                                                                                                        |
|-----|----------------------|---------------------------------------------------------------------------------------------------------------------------------------------------------------------------------------------------------------------------------------------------------------------------------|
| 8   | 391                  | Panhypogammaglobulinemia and poor strep pneumo response, 6% switched memory, 463 B cells/ uL                                                                                                                                                                                    |
| 11  | 450                  | Kabuki Syndrome KMT2D, ALPS-like phenotype with Evans syndrome; no recurrent infections. 0/23 pneumococcal serotypes                                                                                                                                                            |
| 14  | 228                  | Mild eczema, recurrent ear infections; Older sister with hypogam and recurrent sinopulmonary infections; Poor HiB and tetanus responses                                                                                                                                         |
| 16  | 391                  | Pneumonias, hypogam as toddler, sinus infections, poor pneumococcal responses 10/23                                                                                                                                                                                             |
| 18  | 48                   | Panhypogammaglobulinemia; few sinopulmonary infections, hospitalized for gastritis, failure to thrive; low switched memory 0.2% of PBL                                                                                                                                          |
| 18  | 390                  | LRBA deficiency. enteropathy, hypogammaglobulinemia, granulomatous lung disease and Evans syndrome; autoimmune hepatitis;                                                                                                                                                       |
| 18  | 586                  | TACI R202H, recurrent sinus infections and pneumonia; very low switched memory B cells (0.4% of PBL); brother and father affected                                                                                                                                               |
| 19  | 407                  | Early childhood with many infections and eczema; diagnosed age 7; Recurrent otitis media, sinusitis and bronchitis. Multiple courses of antibiotics yearly. Tonsillectomy and adenoidectomy and myringotomy tubes x 2. low switched memory B cells; 7/23 pneumococcal serotypes |
| 23  | 514                  | Recurrent pneumonias as child, erythrocytosis, 10/23 pneumococcal serotypes                                                                                                                                                                                                     |
| 24  | 221                  | Recurrent ITP, Evans syndrome, mastoiditis, low memory B cells, absent tetanus T cell response                                                                                                                                                                                  |
| 24  | 320                  | Warts, autoimmune encephalitis and stroke; utterly absent tetanus, HiB and pneumococcal titers; mother affected                                                                                                                                                                 |
| 24  | 503                  | Sinus infections; GLILD; Very low switched memory 0.2%; high CD21 low B cells 21%; low HiB, 0/23 pneumococcal serotypes, low tetanus antibodies                                                                                                                                 |
| 24  | 451                  | 22q11DS plus TACI C104R heterozygous; severe autoimmunity; chronic urticaria; Evans syndrome; B cell deficiency (20-50 / $\mu$ L); 77% CD21 low B cells                                                                                                                         |
| 25  | 270                  | Hypogam and poor vaccine responses, recurrent sinopulmonary infections                                                                                                                                                                                                          |
| 26  | 213                  | ITP (+steroids), severe hypogam, no response to tetanus and pneumococcal (0/14 pneumococcal serotypes), alopecia                                                                                                                                                                |
| 27  | 290                  | Pancytopenia, Evans syndrome, 7/23 pneumococcal serotypes, low switched memory (2%)                                                                                                                                                                                             |
| 27  | 320                  | Frequent sinus infections; tonsillectomy; low tetanus titer; 2/23 pneumococcal serotypes after pneumovax, 12/23 after Prevnar                                                                                                                                                   |
| 27  | 184                  | Bronchiectasis, pneumonias, sinus infections, panhypogammaglobulinemia                                                                                                                                                                                                          |
| 57  | 413                  | Hypogam, arthritis, 10/23 pneumococcal serotypes, sepsis                                                                                                                                                                                                                        |
| 28  | 341                  | Chronic cough and sinusitis in college, poor pneumococcal (0/23 serotypes), low switched memory                                                                                                                                                                                 |
| 28  | 467                  | Recurrent sinus infections, lymphoproliferation, Father with CVID; "poor pneumococcal response"                                                                                                                                                                                 |
| 28  | 590                  | Severe AIHA and Evans syndrome since infancy, splenectomy, +lymphoproliferation, 0/23 pneumococcal serotypes                                                                                                                                                                    |
| 29  | 214                  | Frequent sinus infections; cough; croup; panhypogammaglobulinemia; 0/23 pneumococcal serotypes                                                                                                                                                                                  |
| 31  | 49                   | CTLA4 deficiency; neutropenia, AIHA, CNS vasculitis; sepsis                                                                                                                                                                                                                     |
| 31  | 164                  | Sinus infections, diarrhea, otitis, no thrush, short stature, 0/23 pneumococcal serotypes                                                                                                                                                                                       |
| 33  | 100                  | Pneumonias; bronchiectasis; panhypogammaglobulinemia, low B cells (38 / $\mu$ L), intermittent CD4 cytopenia,                                                                                                                                                                   |
| 33  | 380                  | STAT1 gof, infections, cellulitis, facial candida, thrush, non-TB mycobacterial infection, onychomycosis, multiple pneumonias; deceased of myocarditis                                                                                                                          |
| 33  | 560                  | Pneumonias starting at 15, GLILD; lymphoproliferative phenotype, panhypogammaglobulinemia; mild T and B penia                                                                                                                                                                   |
| 33  | 565                  | Chronic diarrhea, fungal skin infections; 2/23 pneumococcal serotypes, low switch memory 1.3%                                                                                                                                                                                   |

|    |     |                                                                                                                                                                                       |
|----|-----|---------------------------------------------------------------------------------------------------------------------------------------------------------------------------------------|
| 33 | <35 | ITP, recurrent pneumonias; warts, high T cells, normal number of B cells, total panhypogammaglobulinemia; no switched memory B cells, 0/23 pneumococcal serotypes                     |
| 35 | 475 | Chronic diarrhea, one pneumonia; enteritis with prominent lymphoid aggregates in colon; panhypogammaglobulinemia; 0/23 pneumococcal serotypes                                         |
| 35 | 526 | Vasculitis, warts; retroperitoneal fibrosis; osteomyelitis; mild B cell-penia, recent T cell-penia, low NK cells                                                                      |
| 37 | 510 | Otitis and sinus infections since childhood, rhinitis, viral meningitis; normal switched memory B cells; "low titers" after vaccine                                                   |
| 38 | 434 | XLP, lymphoma age 12; recurrent infections                                                                                                                                            |
| 39 | 321 | Diagnosed age 12 after meningitis, 0% switched memory B cells                                                                                                                         |
| 39 | 300 | Age 8 multiple sinopulmonary infections, poor wound healing, diagnosed as teenager                                                                                                    |
| 43 | 384 | Recurrent ear infections, bronchiectasis, asthma, history of recurrent pulmonary MAC infection requiring lobectomy), recurrent sinusitis; low 50 B cells, 3/23 pneumococcal serotypes |
| 44 | 276 | Lymphadenopathy, no steroids, +sinus, eczema, very low switched memory mem B cells, panhypogammaglobulinemia; 0/23 pneumococcal serotypes                                             |
| 44 | 488 | Recurrent sinus infections and surgeries; Utterly absent panhypogammaglobulinemia; no B cell memory, 13% CD21 low B cells                                                             |
| 44 | 496 | AIHA starting age 17, ITP, chronic diarrhea, lymphadenopathy                                                                                                                          |
| 44 | 22  | Pneumonia started at age 21, chronic diarrhea; sigmoid cancer in 40s; absent strep titers; utterly absent panhypogammaglobulinemia                                                    |
| 44 | 255 | NFKB1 deficiency, ITP, recurrent otitis, sinus, chronic diarrhea; nodular regenerative hyperplasia of liver; tetanus low                                                              |
| 46 | 438 | ITP; few infections; treated with steroids prior to diagnosis; hypogam persisted at least one year after cessation of steroids, 4/23 pneumococcal serotypes                           |
| 46 | 441 | Age 15, recurrent pneumonias and sinus infections                                                                                                                                     |
| 46 | 523 | SLE-scleroderma, received rituxan, wound healing, panhypogammaglobulinemia, ILD                                                                                                       |
| 46 | 626 | Sinus infections, pneumonias, initially diagnosed as IgM deficiency, "poor pneumococcal response", lymphopenia                                                                        |
| 47 | 410 | Starting age 12 multiple otitis, few pneumonias                                                                                                                                       |
| 48 | 253 | Pneumonias as child; GLILD; granulomas on vocal cords; 5/23 pneumococcal serotypes                                                                                                    |
| 48 | 540 | IPEX-like enteritis, Evans syndrome, bronchiectasis                                                                                                                                   |
| 48 | 510 | Frequent sinopulmonary infections; Low CD4 T cells, low switched memory 0.3% of PBL, very high CD21 low B cells (48%)                                                                 |
| 48 | 590 | Seizures, inflammatory pseudotumor, recurrent pneumonia requiring lobectomy                                                                                                           |
| 49 | 250 | Recurrent sinus infections, diagnosed in teens                                                                                                                                        |
| 50 | 351 | Allergic rhinitis, bronchitis, otitis as child, no steroids                                                                                                                           |
| 50 | 369 | 8-10 years of frequent sinus infections, bronchitis and UTIs; 1/23 pneumococcal serotypes                                                                                             |
| 51 | 537 | Chronic sinus infections, brother with hypogam; 3/12 pneumococcal serotypes                                                                                                           |
| 51 | 539 | TACI; multiple sinus infections; chronic diarrhea, multiple pneumonias, legionella, coccidioidomycosis; low HiB titer, 1/23 pneumococcal                                              |
| 51 | 33  | Age 22 recurrent pneumonia and sinus infections; utterly panhypogammaglobulinemia                                                                                                     |
| 52 | 226 | Recurrent infections, GLILD; +ITP, lymphadenopathy, Arthritis, splenectomy for ITP; panhypogammaglobulinemia; high T cells; "No response to vaccines"                                 |
| 53 | 99  | Age 26 recurrent sinopulmonary infections, pancytopenia, GLILD dx on biopsies, very low T cells                                                                                       |
| 53 | 460 | Age 20-30s multiple bronchitis, pneumonias, hospitalizations; inadequate vaccine responses                                                                                            |
| 54 | 369 | Recurrent sinusitis, pneumonias. 2/23 pneumococcal serotypes                                                                                                                          |
| 54 | 465 | Age 30s sinus infections, UTI, vomiting/diarrhea, 11/23 pneumococcal serotypes                                                                                                        |
| 54 | 494 | Sinus infections, pneumonias with hospitalizations; 2/14 pneumococcal serotypes                                                                                                       |
| 54 | 494 | Frequent sinus infections, asthma, ITP; no steroids; 6/23 pneumococcal serotypes                                                                                                      |
| 54 | 180 | Age 26 recurrent sinus, otitis as child                                                                                                                                               |

|    |     |                                                                                                                                                                                                                                                                        |
|----|-----|------------------------------------------------------------------------------------------------------------------------------------------------------------------------------------------------------------------------------------------------------------------------|
| 55 | 291 | Recurrent ITP, +treatment with steroids prior to diagnosis, lymphadenitis consistent sarcoidosis; 1/23 pneumococcal serotypes, low tetanus antibody response                                                                                                           |
| 55 | 33  | Eczema, sinus infections for 10 years, utterly panhypogammaglobulinemia                                                                                                                                                                                                |
| 55 | 428 | Recurrent shingles; 0/14 pneumococcal serotypes, good tetanus response                                                                                                                                                                                                 |
| 55 | 472 | Recurrent sinusitis and otitis; +ITP, hemolytic anemia, very low T (150) and B cells; +treatment with steroids prior to diagnosis                                                                                                                                      |
| 55 | 598 | Recurrent sinus infections, 1/23 pneumococcal serotypes                                                                                                                                                                                                                |
| 55 | 156 | recurrent sinus infections with bronchitis and pneumonias, Rhinitis, Hypothyroidism, Skin infections, Urticaria                                                                                                                                                        |
| 56 | 73  | Innumerable sinus and bronchial infections, chronic liver disease, ITP                                                                                                                                                                                                 |
| 56 | 599 | CTLA4 deficiency; Pneumonias; GLILD; recurrent MRSA infections of the skin, recurrent otitis media, ITP requiring splenectomy, allergic rhinitis; 0.3% switched memory B cells; 4/12 pneumococcal serotypes; no detectable tetanus vaccine response                    |
| 56 | 518 | Recurrent lung infections; Bechet's; Raynaud's                                                                                                                                                                                                                         |
| 57 | 375 | Multiple hospitalizations for dyspnea and coughing, Low B cells 53, 4/23 pneumococcal serotypes post vaccine                                                                                                                                                           |
| 58 | 516 | Dyspnea, aspergillus lung infection, ILD; treated with steroids but weaned down to 5 mg before pneumococcal vaccine challenge 5/23 serotypes; deceased from pneumonia                                                                                                  |
| 58 | 615 | Chronic sinus infections, 7/15 pneumococcal serotypes post vaccine                                                                                                                                                                                                     |
| 59 | 287 | Lifelong history of recurrent infections, mostly sinopulmonary in nature. 2/23 pneumococcal after vaccine                                                                                                                                                              |
| 59 | 300 | sinusitis and pneumonia about 10 times per year requiring systemic antibiotics; frequent UTI's, no autoimmunity, 64 B cell / $\mu$ L, no steroids, normal switched memory B cells; 18% CD21 low B cells                                                                |
| 59 | 484 | Sinus infections since childhood; son affected; low B cells (64 / $\mu$ L) with low switched memory (0.5% of PBL)                                                                                                                                                      |
| 59 | 542 | TREX1 deficiency AD, lung granulomas biopsy confirmed, 11/23 pneumococcal serotypes post vaccine                                                                                                                                                                       |
| 60 | 90  | bronchitis, sinusitis, pneumonia during childhood; dental infection; severe panhypogammaglobulinemia                                                                                                                                                                   |
| 60 | 200 | Recurrent bacterial respiratory infections including sinusitis, bronchitis and pneumonia, Psoriatic arthritis; severe panhypogammaglobulinemia; 0 B cells                                                                                                              |
| 60 | 500 | Chronic sinusitis, chronic otitis media arthritis, asthma, Chronic EBV, lymphopenia                                                                                                                                                                                    |
| 60 | 457 | Recurrent infections, soft tissue infections, dental abscess, 5/23 pneumococcal serotypes post vaccine, tetanus protective                                                                                                                                             |
| 60 | 560 | Otitis in childhood with tubes; Recurrent sinus infections (pansinusitis), chronic rhinitis, two sinus surgeries; recurrent bronchitis; autoimmunity (SLE, Hashimoto's), no steroids, history of MGUS, fibromyalgia, H pylori infection; 5-6/14 pneumococcal serotypes |
| 60 | 570 | Recurrent sinus infections and pneumonias, bronchiectasis, esophageal candidiasis                                                                                                                                                                                      |
| 61 | 20  | Recurrent sinusitis, pneumonia, meningitis, chronic diarrhea requiring hospitalization since teens; utterly absent panhypogammaglobulinemia                                                                                                                            |
| 61 | 596 | Recurrent otitis as child, recurrent sinus infections in 40s; interstitial cystitis, GERD, MS (not on steroids); 6/23 pneumococcal serotypes                                                                                                                           |
| 62 | 381 | 4-6 sinus infections per year in early 20s, Viral URIs, multiple episodes of bronchitis, IBS, Chronic rhinitis; 8/23 pneumococcal serotypes                                                                                                                            |
| 62 | 514 | Recurrent tonsillitis as a child, Chronic sinusitis in 20s; Very low T cells in 60s (230 / $\mu$ L); very low switched memory (0.4% of PBL)                                                                                                                            |
| 62 | 560 | Recurrent respiratory infections in 30s, bronchiectasis, diarrhea, asthma, frequent gastrointestinal infections; 4/23 serotypes after vaccination; 0% switched memory B cells                                                                                          |
| 62 | 588 | Frequent sinopulmonary infections in 20s, "poor vaccine titers" after vaccination                                                                                                                                                                                      |
| 63 | 275 | Developed sinus and fungal infections in 20s, frequent bronchitis, lymphadenopathy, chronic diarrhea, osteomyelitis, IBS, 0/23 pneumococcal serotypes 0/23 protective post vaccination                                                                                 |



|    |     |                                                                                                                                                                                                                                                                        |
|----|-----|------------------------------------------------------------------------------------------------------------------------------------------------------------------------------------------------------------------------------------------------------------------------|
| 63 | 493 | Bronchiectasis, recurrent respiratory infections, Chronic sinusitis, ITP, MALT Lymphoma, CVID diagnosed 1995, Asthma, Arthritis                                                                                                                                        |
| 63 | 389 | Recurrent upper respiratory tract infections, intestinal bacterial overgrowth, Urticaria, mildly low T cells and B cells                                                                                                                                               |
| 64 | 134 | Multiple pneumonias in 40s, Bronchiectasis, Recurrent URIs, Chronic cough                                                                                                                                                                                              |
| 64 | 503 | RTEL1-deficiency; Lung infections and pulmonary fibrosis; recurrent ITP since childhood                                                                                                                                                                                |
| 64 | 580 | Frequent infections in childhood including pneumonias and viral infections; recurrent sinus infections s/p sinus surgery, oligoarthritis, Asthma, Psoriasis; 9/23 pneumococcal serotypes; mildly low B cells (82 / $\mu$ L)                                            |
| 65 | 254 | Sinusitis, Asthma, RA, ankylosing spondylitis, recurrent C difficile and chronic diarrhea; 1/14 pneumococcal serotypes after vaccine, T cell count mildly low (514). Total B cell numbers slightly low (91) normal switched memory and no increase in immature B cells |
| 65 | 330 | Pneumonias and sinusitis during early 20s, Chronic diarrhea, Granulomatous disease, 50% pneumococcal serotypes after vaccination, infection-associated amputations, COPD                                                                                               |
| 65 | 449 | Chronic sinusitis, Recurrent otitis media with Aspergillus niger, Chronic pain syndrome, chronic fevers dental infections, Deceased of sepsis                                                                                                                          |
| 65 | 530 | Bronchitis and sinus infections, chronic C diff, chronic cough, IBS, interstitial cystitis, UTIs                                                                                                                                                                       |
| 65 | 304 | Bronchiectasis, arthritis, recurrent sinusitis, Chronic diarrhea, "poor vaccine antibodies and despite booster"                                                                                                                                                        |
| 66 | 293 | As a child, many gastroenteritis infections and respiratory infections; ulcerative colitis in 40s; panhypogammaglobulinemia; Pre- and post-titers of diphtheria were undetectable and HiB whereas tetanus did show boosting (>4 fold)                                  |
| 66 | 332 | Lymphadenopathy without clonality, Frequent infections in childhood, low CD4 and CD8 T cells prior to cancer                                                                                                                                                           |
| 66 | 506 | Dermatitis, recurrent gastrointestinal problems since age 20 y, Multiple pneumonia hospitalizations, Asthma, Arthritis, recurrent sinus infections, Frequent strep pharyngitis in teens, ILD                                                                           |
| 66 | 613 | Starting at age 10 y, recurrent sinus infections per year, multiple bronchitis, arthritis. Low B (23 / $\mu$ L) and T cells (252 / $\mu$ L), ITP, dental infections; very low switched memory (0.02% of PBL), very high CD21 low B cells (56%)                         |
| 67 | 516 | Bronchiectasis, pneumonias, 10/23 pneumococcal titers, tetanus protective                                                                                                                                                                                              |
| 67 | 527 | No sinopulmonary infections as child but in 40s developed recurrent sinusitis (proteus, pseudomonas, staph) and otitis; autoimmune thyroiditis, AIHA, Sjogren's; very low B cells (13 / $\mu$ L); 1/23 pneumococcal titers; deceased of ovarian cancer                 |
| 67 | 621 | Chronic diarrhea, no respiratory infections, very low classed switched B cells (0.4% of PBL), low T cells, 14/23 pneumococcal serotypes; losses of Ig ruled out                                                                                                        |
| 68 | 306 | Pneumonia, SLE/MCTD (not on steroids, no rituximab), absent switched memory B cells; 0/23 pneumococcal serotypes after vaccination, tetanus protective                                                                                                                 |
| 68 | 500 | TACI S144X and C193R; Recurrent sinus infections and bronchitis, bronchiectasis, chronic diarrhea, osteomyelitis x 2                                                                                                                                                   |
| 68 | 513 | Recurrent infections, mycobacterium pneumonia 2-4 times, multiple osteomyelitis, cellulitis, recurrent staph infections, 4/23 pneumococcal serotypes, HiB non-protective                                                                                               |
| 68 | 526 | Recurrent sinusitis and bronchitis; cellulitis, diverticulitis, GERD                                                                                                                                                                                                   |
| 68 | 523 | Recurrent sinus infections, bronchitis, sinus surgery                                                                                                                                                                                                                  |
| 68 | 586 | Recurrent sinus infections in the 50s including four sinus surgeries, GI symptoms including chronic diarrhea, allergic rhinitis, 9/23 pneumococcal serotypes                                                                                                           |
| 68 | 190 | Pneumonias in 40s and 50s, few sinus infections, psoriasis, asthma, allergic rhinitis, osteoporosis, GERD, rheumatoid arthritis, +steroids prior to diagnosis but IgG 190 was off steroids for months                                                                  |
| 69 | 320 | Recurrent sinus infections with sinus surgery, Osteoarthritis, Addison's disease, Stroke, SLE                                                                                                                                                                          |
| 69 | 400 | Recurrent lung infections, Bronchiectasis, Chronic cough, Pancreatitis, chronic sinusitis, chronic UTI, SLE, Asthma, Antiphospholipid syndrome, Colitis                                                                                                                |
| 69 | 423 | Chronic respiratory infections, bronchiectasis, arthritis, lupus, fibromyalgia, Recurrent sinus infections with sinus surgeries, "Low pneumococcal titers"                                                                                                             |



|    |     |                                                                                                                                                                                                                                                                        |
|----|-----|------------------------------------------------------------------------------------------------------------------------------------------------------------------------------------------------------------------------------------------------------------------------|
| 69 | 452 | Recurrent bronchitis and sinusitis, COVID 2x, Shingles 3x, Vasculitis, IBS, Eczema, osteoarthritis                                                                                                                                                                     |
| 69 | 581 | Asthma, Recurrent sinus infections, eye infections, chronic cough, Gastroenteritis                                                                                                                                                                                     |
| 69 | 607 | sinus infections, recurrent respiratory infections x 30 years, recurrent thrush, Cellulitis, chronic UTI, 4/23 pneumococcal serotypes                                                                                                                                  |
| 69 | 619 | Chronic Sinusitis x 30 y, Asthma, Fibromyalgia, Hashimotos, Hypertension                                                                                                                                                                                               |
| 69 | 364 | Chronic sinus infections with multiple surgeries, Multiple episodes of sepsis due to multifocal pneumonia, Fibromyalgia                                                                                                                                                |
| 70 | 319 | Sinus infections and bronchitis 5 times a year, ILD, Seronegative SLE, Asthma, Osteoporosis                                                                                                                                                                            |
| 70 | 500 | Recurrent UTI, recurrent respiratory infection, chronic sinusitis, Bronchiectasis, Sjogren's, Hashimoto's thyroiditis                                                                                                                                                  |
| 70 | 400 | Chronic URI and sinus infections, Bronchiectasis, Asthma, 9/23 pneumococcal serotypes                                                                                                                                                                                  |
| 71 | 353 | Recurrent otitis in childhood, Multiple episodes of bronchitis and pneumonia, recurrent skin and nail infections, CAD, Psoriasis, chronic nephrolithiasis, multiple GI infections, 5/23 pneumococcal serotypes                                                         |
| 71 | 415 | Recurrent sinus infections since 40s, Rhinitis, Sjogren's, 2/23 pneumococcal serotypes                                                                                                                                                                                 |
| 71 | 451 | Recurrent sinus infections, Asthma, GERD, Arthritis, Osteoporosis, Dermatitis, Chronic cough, 4/23 pneumococcal serotypes                                                                                                                                              |
| 72 | 450 | Bronchiectasis, COPD, asthma, chronic mycobacterial infections, Basal cell carcinoma, Osteoarthritis, 3/14 pneumococcal serotypes                                                                                                                                      |
| 72 | 523 | Allergic Rhinitis, Multiple otitis and hearing Loss since age 3, chronic sinusitis, Hypothyroidism, Asthma, Hypothyroidism, 1/23 pneumococcal serotypes                                                                                                                |
| 72 | 563 | Recurrent sinus infections approximately every 6 weeks, Rhinitis, Asthma,                                                                                                                                                                                              |
| 72 | 599 | Recurrent Infections, Osteoarthritis, Lymphopenia, Recurrent sinus infections despite therapy, Low B cells                                                                                                                                                             |
| 73 | 322 | Starting age 12, recurrent sinusitis, recurrent otitis, Asthma, Rhinitis                                                                                                                                                                                               |
| 73 | 523 | Chronic bronchitis in mid 30s, pneumonias with multiple hospitalizations throughout life                                                                                                                                                                               |
| 73 | 527 | Chronic lung infections, Bronchiectasis, Pseudomonas lung disease, Rhinovirus, COPD, Recurrent MAC, Eczema, Asthma, "low pneumococcal serotypes" one month after vaccine                                                                                               |
| 73 | 411 | Recurrent pneumonia/ bronchiectasis exacerbations due to MSSA and pseudomonas, pulmonary MAC, pulmonary nocardiosis, Chronic sinusitis, antibiotic use 2-3 times a year, Arthritis, Hashimoto thyroiditis, URIs, Deceased from COVID-19                                |
| 73 | 300 | No recurrent infections, infrequent URIs, myasthenia gravis, MCTD, Sjogren's, pneumococcal 0/23 serotypes                                                                                                                                                              |
| 74 | 363 | Age 18 chronic sinopulmonary infections, asthma, recurrent sinus infections, Breast cancer, Hypothyroidism. ~12 months of steroids for cervical spine injury prior to diagnosis, but stopped for 6 months subsequent IgG 363, repeat 375. Pneumococcal 3/23 serotypes. |
| 74 | 520 | Chronic diarrhea, Gastritis, Recurrent sinusitis, chronic pharyngitis, chronic UTI Non-Hodgkin's lymphoma 2015. Elevated IgM consistently. CVID diagnosis was 8 y before lymphoma diagnosis                                                                            |
| 76 | 104 | Chronic sinus infections in age 60s, seronegative RA, no Ig losses with panhypogammaglobulinemia, 0% switched memory B cells, 0/23 pneumococcal serotypes                                                                                                              |
| 76 | 370 | Respiratory infections; sinusitis; anemia, Asthma, COPD / Emphysema; 11/23 pneumococcal serotypes                                                                                                                                                                      |
| 76 | 520 | Sinus infections in childhood; recurrent scalp infections; Osteoarthritis, Chronic UTI, Neuropathy, IBS, Vasculitis                                                                                                                                                    |
| 76 | 408 | Recurrent respiratory infections, recurrent diarrhea; rubella infections several times, recurrent mouth sores; fatigue; fibromyalgia, osteoporosis                                                                                                                     |
| 77 | 413 | Recurrent respiratory infections in childhood; Asthma, Allergic rhinitis, IBS, Psoriatic Arthritis, Sepsis; No response to pneumovax                                                                                                                                   |
| 77 | 633 | Chronic GI infections; Seronegative autoimmune arthritis, anemia; Low B cell memory, Low Class switched memory B cells, Low Plasmablasts                                                                                                                               |

|    |     |                                                                                                                                                                                                                  |
|----|-----|------------------------------------------------------------------------------------------------------------------------------------------------------------------------------------------------------------------|
| 78 | 356 | Frequent pharyngitis requiring tonsillectomy; recurrent otitis; Pneumonias twice a year as well as bronchitis; Bronchiectasis; low T cells; absent plasmablasts; elevated CD21 low B cells (12%)                 |
| 78 | <35 | 2-3 sinopulmonary infections per year, arthritis, osteomyelitis, thrombocytopenia; 1/14 pneumococcal serotypes                                                                                                   |
| 79 | 229 | Recurrent infections as a child, Pneumonia 2x, chronic pruritus, COPD                                                                                                                                            |
| 80 | 86  | Recurrent pharyngitis requiring tonsillectomy, age 20-30s recurrent sinus infections; bronchiectasis; chronic MAC and aspergillus, 3/23 pneumococcal titers                                                      |
| 80 | 300 | Recurrent skin and respiratory infections; Bronchiectasis; MAI; Pseudomonas; dermatitis, IDDM, Adrenal insufficiency. 8/23 pneumococcal titers                                                                   |
| 80 | 423 | Bronchiectasis; Macrocytosis, Numerous skin infections; Hashimotos, Asthma, Polyarthritis, undifferentiated connective tissue disease, low memory B cells,                                                       |
| 80 | 556 | Recurrent sinopulmonary infections with antibiotic 3-4 times a year, hospitalized with pneumonia several times; COPD, Arthritis, Asthma, Emphysema; pneumococcal 7/23 serotypes, only 1% switched memory B cells |
| 81 | 512 | Chronic ear infections; Chronic Cough; Bronchiectasis; Squamous cell carcinoma of tongue, recent CKD                                                                                                             |
| 81 | 560 | History of recurrent sinusitis in childhood; T2DM with peripheral Neuropathy, Giant cell arteritis, Parkinson's, recent development of CKD, GI Infections                                                        |
| 81 | 460 | Recurrent sinus infections since childhood; Leukopenia, Thrombocytopenia; Ankylosing Spondylitis, Diabetes, Breast cancer                                                                                        |
| 81 | 548 | Chronic Rhinitis, Bronchiectasis, MAI/MAC infections; Pseudomonas respiratory infections; Asthma, GERD                                                                                                           |
| 82 | 330 | Chronic Rhinitis, Diverticulosis, Chronic Cough, GI Infections; PMH Carcinoid Tumor                                                                                                                              |
| 82 | 403 | Chronic Bronchitis, Sinusitis, COPD, Asthma, Chronic URI, Chronic GI infections, Diarrhea                                                                                                                        |
| 82 | 535 | Childhood recurrent respiratory infections; Bronchiectasis; Crohn's disease x 20 years                                                                                                                           |
| 82 | 640 | Recurrent Pneumonia; Neutropenia, Arthritis, Recurrent UTI, Sjogren's 2017, Chronic Cough, Adenopathy, Low B cells                                                                                               |
| 83 | 554 | Chronic Bronchitis, chronic rhinitis; Neutropenia, B Cell Lymphoma, Alopecia, Diabetes Mellitus, Low B Cells                                                                                                     |
| 83 | 590 | Multiple Pneumonias with hospitalizations                                                                                                                                                                        |
| 83 | 630 | Scleroderma, Osteoporosis, CKD, ILD, Chronic Upper respiratory Infections; recurrent GI infections                                                                                                               |
| 83 | 509 | Recurrent Infections during early life (Respiratory, Skin, and sinus), Chronic Rhinitis; Leukopenia, CKD in 70s (mild proteinuria), no steroids                                                                  |
| 84 | 240 | Chronic Diarrhea, GI infections; chronic sinusitis, Multiple pneumonias; COPD                                                                                                                                    |
| 84 | 300 | Recurrent Respiratory infections, many bacterial skin infections, Hypothyroidism, Breast cancer 2004, pneumococcal 3/23 serotypes                                                                                |
| 84 | 355 | Chronic Sinus infections, Osteoarthritis, Fibromyalgia, Atrophic gastritis                                                                                                                                       |
| 84 | 491 | Recurrent Pneumonia; COPD, Bronchiectasis; Osteoarthritis, CREST, History of breast cancer, FVT, Hypothyroid                                                                                                     |
| 86 | 446 | Recurrent lung infections, Chronic Rhinitis, Bronchiectasis, Leukopenia, Transaminitis, history of Basal cell carcinoma                                                                                          |
| 88 | 482 | Chronic Rhinitis, recurrent pneumonia; Asthma; Colonic Polyps                                                                                                                                                    |
| 89 | 200 | Recurrent URIs, Sinusitis, Mycosis Fungoides, no Steroids, 6/23 Pneumococcal serotypes                                                                                                                           |
| 90 | 340 | Chronic Sinusitis, in elderly years CKD, no autoimmunity                                                                                                                                                         |
| 91 | 472 | Chronic sinusitis; Rhinitis; 8/23 pneumococcal serotypes                                                                                                                                                         |
| 92 | 426 | Respiratory infections since 60s; COPD                                                                                                                                                                           |
| 59 | 121 | Thymoma, 2/23 pneumococcal serotypes after vaccination                                                                                                                                                           |
| 37 | 130 | Pneumonia w empyema, +/- SLE; progressive diminishment of B cells, 3/23 pneumococcal serotypes                                                                                                                   |

**Table S2.**

|                              | <b>Top 100</b> | <b>Random 100</b> |
|------------------------------|----------------|-------------------|
| <b>Age (years)</b>           |                |                   |
| Mean                         | 57.4           | 43.4              |
| Median                       | 61             | 42                |
| <b>Sex (%)</b>               |                |                   |
| Male                         | 72             | 54                |
| Female                       | 28             | 46                |
| <b>Number of ICD codes</b>   |                |                   |
| Mean unique                  | 242.0          | 30.8              |
| Median                       | 210            | 18                |
| <b>Medical record length</b> |                |                   |
| Mean years                   | 15.5           | 7.07              |

**Demographics of top 100 patients identified by PheNet and 100 randomly sampled patients.** We show a summary of the top 100 individuals with the highest PheNet score out of the discovery cohort (n = ~880K) and a control group of 100 randomly sampled patients from the patient population. We provide summary statistics on patients' age, self-reported sex, number of unique ICD codes, and the number of years recorded in the EHR.

**Table S3**

| Feature | OMIM-derived | Phenotype                                  | Frequency (case cohort) | Frequency (all patients) | Log-OR | OR    | Category     |
|---------|--------------|--------------------------------------------|-------------------------|--------------------------|--------|-------|--------------|
| 279.1   |              | Immunity deficiency                        | 41.62%                  | 0.48%                    | 3.758  | 42.84 |              |
| 283     | x            | Hemolytic anemias                          | 4.57%                   | 0.16%                    | 3.333  | 28.01 | Autoimmunity |
| 255.2   | x            | Adrenal hypofunction                       | 0.51%                   | 0.01%                    | 3.258  | 26.00 | Autoimmunity |
| 496.3   | x            | Bronchiectasis                             | 23.35%                  | 0.56%                    | 2.995  | 20.00 | Infection    |
| 287.31  |              | Thombocytopenia                            | 9.64%                   | 0.24%                    | 2.953  | 19.16 | Autoimmunity |
| 31      |              | Diseases due to mycobacteria               | 4.57%                   | 0.13%                    | 2.886  | 17.92 | Infection    |
| 279.2   |              | Autoimmune disease NEC                     | 6.09%                   | 0.15%                    | 2.746  | 15.57 | Autoimmunity |
| 709.7   |              | Diffuse connective tissue disease          | 14.21%                  | 0.51%                    | 2.572  | 13.09 | Autoimmunity |
| 279.8   |              | Immune mechanism disorders                 | 4.06%                   | 0.07%                    | 2.483  | 11.98 | Autoimmunity |
| 502     |              | Postinflammatory pulmonary fibrosis        | 15.23%                  | 0.79%                    | 2.336  | 10.34 | Autoimmunity |
| IGG     |              | Igg < 600                                  | NA                      | NA                       | 2.266  | 9.64  |              |
| 253.5   | x            | Failure to Thrive                          | 1.52%                   | 0.10%                    | 1.997  | 7.37  | Other        |
| 504     |              | Alveolar pneumonopathy                     | 9.64%                   | 0.52%                    | 1.976  | 7.21  | Autoimmunity |
| 472     |              | Chronic pharyngitis and nasopharyngitis    | 24.37%                  | 1.96%                    | 1.890  | 6.62  | Infection    |
| 475     | x            | Chronic sinusitis                          | 47.72%                  | 4.45%                    | 1.709  | 5.52  | Infection    |
| 136     |              | Other infectious and parasitic diseases    | 34.52%                  | 3.13%                    | 1.701  | 5.48  | Infection    |
| 579.2   | x            | Splenomegaly                               | 8.12%                   | 1.02%                    | 1.363  | 3.91  | Autoimmunity |
| 284.1   | x            | Pancytopenia                               | 4.57%                   | 0.81%                    | 1.172  | 3.23  | Autoimmunity |
| 496     | x            | Chronic airway obstruction                 | 13.71%                  | 2.16%                    | 1.160  | 3.19  | Other        |
| 202.2   | x            | Non-Hodgkins lymphoma                      | 4.57%                   | 0.74%                    | 1.059  | 2.88  | Other        |
| 289.4   | x            | Lymphadenitis                              | 17.77%                  | 3.24%                    | 1.048  | 2.85  | Autoimmunity |
| 480     | x            | Pneumonia                                  | 25.38%                  | 4.67%                    | 0.966  | 2.63  | Infection    |
| 555.2   | x            | Ulcerative colitis                         | 3.55%                   | 0.56%                    | 0.935  | 2.55  | Autoimmunity |
| 497     | x            | Bronchitis                                 | 12.18%                  | 2.60%                    | 0.840  | 2.32  | Infection    |
| 41      | x            | Bacterial infection NOS                    | 12.18%                  | 2.86%                    | 0.827  | 2.29  | Infection    |
| 573.3   | x            | Hepatomegaly                               | 6.09%                   | 1.43%                    | 0.789  | 2.20  | Autoimmunity |
| 696.4   | x            | Psoriasis                                  | 5.08%                   | 1.33%                    | 0.779  | 2.18  | Autoimmunity |
| 495     | x            | Asthma                                     | 42.13%                  | 9.56%                    | 0.762  | 2.14  | Autoimmunity |
| 251.1   | x            | Hypoglycemia                               | 2.54%                   | 0.72%                    | 0.686  | 1.98  | Other        |
| 686     | x            | Infections of skin and subcutaneous tissue | 8.63%                   | 2.52%                    | 0.630  | 1.88  | Infection    |
| 561.1   | x            | Diarrhea                                   | 23.86%                  | 6.08%                    | 0.590  | 1.80  | Infection    |
| 320     | x            | Meningitis                                 | 1.52%                   | 0.32%                    | 0.574  | 1.77  | Infection    |
| 369.5   | x            | Conjunctivitis, infectious                 | 6.60%                   | 3.08%                    | 0.133  | 1.14  | Infection    |
| 704.1   | x            | Alopecia                                   | 4.57%                   | 2.11%                    | 0.124  | 1.13  | Autoimmunity |

|       |   |                                    |        |        |        |      |              |
|-------|---|------------------------------------|--------|--------|--------|------|--------------|
| 381.1 | x | Otitis media                       | 4.06%  | 1.92%  | 0.120  | 1.13 | Infection    |
| 555   | x | Inflammatory bowel disease         | 0.00%  | 0.00%  | 0.000  | 1.00 | Autoimmunity |
| 465   | x | Acute upper respiratory infections | 23.86% | 12.86% | -0.078 | 0.92 | Infection    |
| 315   | x | Developmental delays and disorders | 1.02%  | 1.14%  | -0.746 | 0.47 | Other        |
| 716   | x | Other arthropathies                | 0.00%  | 0.02%  | -8.989 | 0.00 | Autoimmunity |

**Phenotype features and lab values scored by PheNet, Frequencies, and Categorization.** Category indicates a broad grouping applied to each phenotype by clinicians. Autoimmunity here implies both autoimmune and inflammatory phenotypes. Other implies phenotypes that were not classified as either of the other two categories.
